# Supplementary material for: Reversible photoluminescence modulation of monolayer MoS2 on a ferroelectric substrate by light irradiation and thermal annealing
Source: Royal Society of Chemistry journal article supplement (doi:10.1039/d1cp02248b), 2021-01-01
Supplement: d1cp02248b1.pdf [file d1cp02248b1.pdf]

Supplementary Information for

**Reversible Photoluminescence Modulation of Monolayer  
MoS<sub>2</sub> on Ferroelectric Substrate by Light Irradiation and  
Thermal Annealing**

Peng Wang,<sup>ac</sup> Jian Wang,<sup>a</sup> Yun Zheng,<sup>a</sup> Hongyan Shi,<sup>ab</sup> Xiudong Sun,<sup>ab</sup> Wenjun Liu,<sup>c</sup>  
and Bo Gao<sup>\*ab</sup>

<sup>a</sup>Institute of Modern Optics, School of Physics, Key Laboratory of Micro-Nano  
Optoelectronic Information System, Ministry of Industry and Information Technology,  
Key Laboratory of Micro-Optics and Photonic Technology of Heilongjiang Province,  
Harbin Institute of Technology, Harbin 150001, China

<sup>b</sup>Collaborative Innovation Center of Extreme Optics, Shanxi University, Taiyuan  
030006, China

<sup>c</sup>Department of Physics, Harbin Institute of Technology at Weihai, Weihai 264209,  
China

\*E-mail: gaobo@hit.edu.cn

## 1. Evaluation of the PDMS transfer process.

In order to evaluate the PDMS transfer process, we transferred CVD-grown monolayer MoS<sub>2</sub> onto hydrophilic SiO<sub>2</sub>/Si substrate as a control, and performed a contrastive study by optical microscopy, micro-Raman and micro-PL spectroscopy. The optical images (Fig. S1a and S1b) show no obvious changes in morphology of monolayer MoS<sub>2</sub>. The in-plane Raman mode  $E_{2g}^1$  (Fig. S1c) blue-shifted from 384.08 cm<sup>-1</sup> to 384.65 cm<sup>-1</sup> due to the release of growth-induced strain in MoS<sub>2</sub> after transfer. The out-plane mode  $A_{1g}$  unchanged, indicating no obvious doping in transferred MoS<sub>2</sub>. Both samples displayed strong PL emission associated with the A and B exciton at 678 nm and 625 nm, respectively, suggesting that the band structure was not affected during the transfer process.

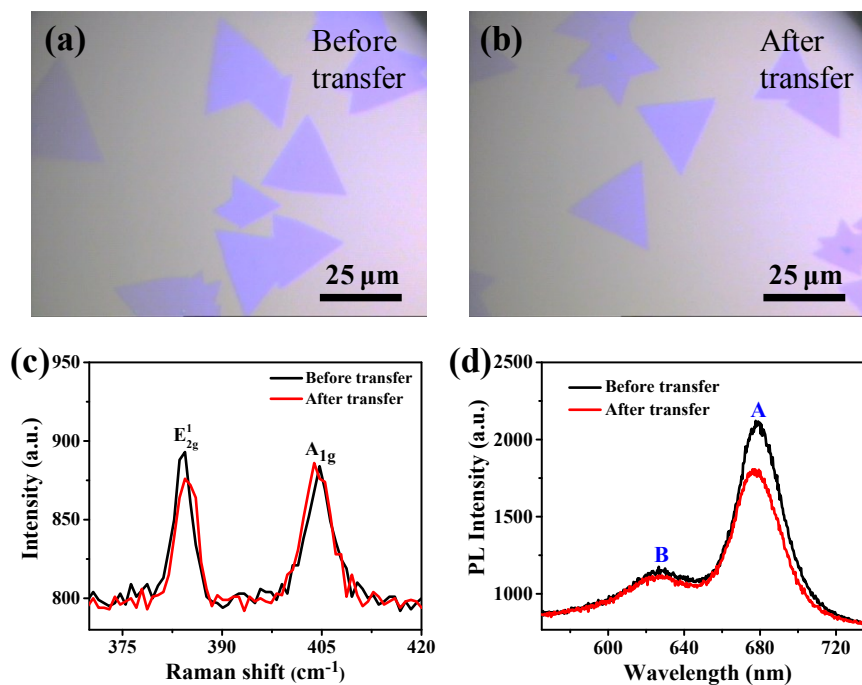

**Fig. S1.** Optical images of CVD-grown monolayer MoS<sub>2</sub> (a) before and (b) after transfer. (c) Raman spectra of MoS<sub>2</sub> before (black line) and after (red line) transfer. (d) PL spectra of MoS<sub>2</sub> before (black line) and after (red line) transfer.

## 2. PL spectra of as-grown MoS<sub>2</sub> before transfer.

Fig. S2 shows the PL spectra of as-grown MoS<sub>2</sub> before transfer. Both samples have uniform light emission, providing an excellent prototype for this study.

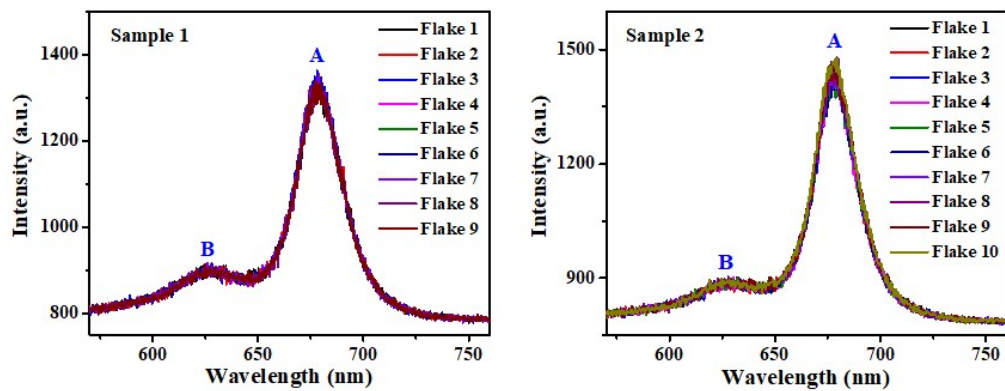

**Fig. S2.** PL spectra of two as-grown MoS<sub>2</sub> samples before transfer.

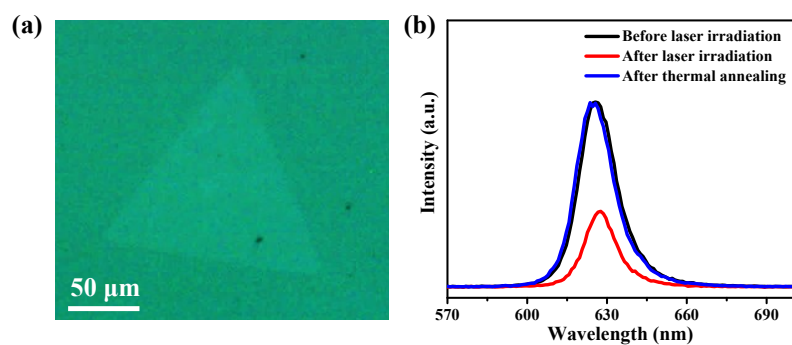

**Fig. S3.** (a) Optical image of CVD-grown monolayer WS<sub>2</sub> on P<sup>+</sup> Fe:LiNbO<sub>3</sub>. (b) PL spectra of monolayer WS<sub>2</sub> on P<sup>+</sup> Fe:LiNbO<sub>3</sub> before laser irradiation, after laser irradiation and after thermal annealing. We also achieved reversible PL modulation of monolayer WS<sub>2</sub> on P<sup>+</sup> Fe:LiNbO<sub>3</sub> substrate by light irradiation and thermal annealing.
